# Supplementary material for: Tumor Vessel Normalization, Immunostimulatory Reprogramming, and Improved Survival in Glioblastoma with Combined Inhibition of PD-1, Angiopoietin-2, and VEGF
Source: Oxford University Press journal article supplement (doi:10.1158/2326-6066.cir-18-0865), 2019-10-09
Supplement: 23266066cir180865-sup-213312_3_supp_5896282_q0vcyk.docx [file 23266066cir180865-sup-213312_3_supp_5896282_q0vcyk.docx]

**Supplementary Movie Legends**

**Supplementary Movie Legend S1. Vessel morphology in** **IgG-treated control glioma.**

Display of dilated, tortuous tumor vessels (collagen IV, red) with few pericytes (desmin, green) in IgG-treated GL261 glioma. Three-dimensional reconstruction movie from confocal images corresponding to Supplementary Figure S3A (tumor, control).

**Supplementary Movie Legend S2. PD-1 therapy does not affect glioma vessel morphology.**

Visualization of collagen IV–positive tumor vessels (red) and desmin-positive pericytes (green) in GL261 gliomas after PD-1 therapy. PD-1 antibody therapy did not affect tumor vessel morphology with sparse pericyte coverage. Three-dimensional reconstruction movie from confocal images corresponding to Supplementary Figure S3A (tumor, anti–PD-1).

**Supplementary Movie Legend S3. Aflibercept and AMG386 therapy leads to a normalized glioma vasculature.**

A normalized vasculature with increased pericytes following Aflibercept and AMG386 therapy in GL261 gliomas is displayed. Tumor vessels: collagen IV (red); pericytes: desmin (green). Three-dimensional reconstruction movie from confocal images corresponding to Supplementary Figure S3A (tumor, Aflibercept/AMG386).

**Supplementary Movie Legend S4. Glioma vessels resemble the vascular morphology in non-tumor-bearing contralateral cortex after triple therapy.**

Visualization of GL261 tumor vessels after treatment with Aflibercept, AMG386, and anti-PD-1 demonstrated a normalized vasculature similar to the unaffected contralateral cortex of glioma-bearing mice. Tumor vessels: collagen IV (red); pericytes: desmin (green). Three-dimensional reconstruction movie from confocal images corresponding to Supplementary Figure S3A (tumor, Aflibercept/AMG386/anti–PD-1).
